# Supplementary material for: Epidemiology of chronic pain in children and adolescents: a protocol for a systematic review update
Source: PubMed Central journal article supplement — BMJ Open. 2021 Feb 16;11(2):e043675. doi: 10.1136/bmjopen-2020-043675 (PMC7888311; doi:10.1136/bmjopen-2020-043675), 2021-02-16
Supplement: bmjopen-2020-043675.draft_revisions.pdf [file bmjopen-2020-043675.draft_revisions.pdf]

# BMJ Open

BMJ Open is committed to open peer review. As part of this commitment we make the peer review history of every article we publish publicly available.

When an article is published we post the peer reviewers' comments and the authors' responses online. We also post the versions of the paper that were used during peer review. These are the versions that the peer review comments apply to.

The versions of the paper that follow are the versions that were submitted during the peer review process. They are not the versions of record or the final published versions. They should not be cited or distributed as the published version of this manuscript.

BMJ Open is an open access journal and the full, final, typeset and author-corrected version of record of the manuscript is available on our site with no access controls, subscription charges or pay-per-view fees (<http://bmjopen.bmj.com>).

If you have any questions on BMJ Open's open peer review process please email [info.bmjopen@bmj.com](mailto:info.bmjopen@bmj.com)

# BMJ Open

## The Epidemiology of Chronic Pain in Children and Adolescents: A Protocol for a Systematic Review Update

|                               |                                                                                                                                                                                                                                                                                                                                                                                                                                                                                                                                                                                                                                                                                                                                                                                                                                                                                                                                                                                                                           |
|-------------------------------|---------------------------------------------------------------------------------------------------------------------------------------------------------------------------------------------------------------------------------------------------------------------------------------------------------------------------------------------------------------------------------------------------------------------------------------------------------------------------------------------------------------------------------------------------------------------------------------------------------------------------------------------------------------------------------------------------------------------------------------------------------------------------------------------------------------------------------------------------------------------------------------------------------------------------------------------------------------------------------------------------------------------------|
| Journal:                      | <i>BMJ Open</i>                                                                                                                                                                                                                                                                                                                                                                                                                                                                                                                                                                                                                                                                                                                                                                                                                                                                                                                                                                                                           |
| Manuscript ID                 | bmjopen-2020-043675                                                                                                                                                                                                                                                                                                                                                                                                                                                                                                                                                                                                                                                                                                                                                                                                                                                                                                                                                                                                       |
| Article Type:                 | Protocol                                                                                                                                                                                                                                                                                                                                                                                                                                                                                                                                                                                                                                                                                                                                                                                                                                                                                                                                                                                                                  |
| Date Submitted by the Author: | 11-Aug-2020                                                                                                                                                                                                                                                                                                                                                                                                                                                                                                                                                                                                                                                                                                                                                                                                                                                                                                                                                                                                               |
| Complete List of Authors:     | Langley, Charlotte; IWK Health Centre, Centre for Pediatric Pain Research<br>Tutelman, Perri; Dalhousie University, Department of Psychology and Neuroscience; IWK Health Centre, Centre for Pediatric Pain Research<br>Parker, Jennifer; IWK Health Centre, Centre for Pediatric Pain Research<br>Chambers, Christine; Dalhousie University, Department of Psychology; IWK Health Centre, Centre for Pediatric Pain Research<br>Finley, Allen; Dalhousie University, Department of Anesthesia, Pain Management & Perioperative Medicine; IWK Health Centre, Centre for Pediatric Pain Research<br>Chapman, Darlene; IWK Health Centre, Health Sciences Library<br>Jones, Gareth; University of Aberdeen, Epidemiology Group and Aberdeen Centre for Arthritis and Musculoskeletal Health<br>Macfarlane, Gary; University of Aberdeen, Epidemiology Group and Aberdeen Centre for Arthritis and Musculoskeletal Health<br>Marianayagam, Justina; Patient Partner and Medical Student; Northern Ontario School of Medicine |
| Keywords:                     | EPIDEMIOLOGY, PAEDIATRICS, PAIN MANAGEMENT                                                                                                                                                                                                                                                                                                                                                                                                                                                                                                                                                                                                                                                                                                                                                                                                                                                                                                                                                                                |
|                               |                                                                                                                                                                                                                                                                                                                                                                                                                                                                                                                                                                                                                                                                                                                                                                                                                                                                                                                                                                                                                           |

SCHOLARONE™  
Manuscripts

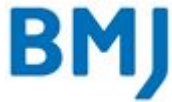

I, the Submitting Author has the right to grant and does grant on behalf of all authors of the Work (as defined in the below author licence), an exclusive licence and/or a non-exclusive licence for contributions from authors who are: i) UK Crown employees; ii) where BMJ has agreed a CC-BY licence shall apply, and/or iii) in accordance with the terms applicable for US Federal Government officers or employees acting as part of their official duties; on a worldwide, perpetual, irrevocable, royalty-free basis to BMJ Publishing Group Ltd ("BMJ") its licensees and where the relevant Journal is co-owned by BMJ to the co-owners of the Journal, to publish the Work in this journal and any other BMJ products and to exploit all rights, as set out in our [licence](#).

The Submitting Author accepts and understands that any supply made under these terms is made by BMJ to the Submitting Author unless you are acting as an employee on behalf of your employer or a postgraduate student of an affiliated institution which is paying any applicable article publishing charge ("APC") for Open Access articles. Where the Submitting Author wishes to make the Work available on an Open Access basis (and intends to pay the relevant APC), the terms of reuse of such Open Access shall be governed by a Creative Commons licence – details of these licences and which [Creative Commons](#) licence will apply to this Work are set out in our licence referred to above.

Other than as permitted in any relevant BMJ Author's Self Archiving Policies, I confirm this Work has not been accepted for publication elsewhere, is not being considered for publication elsewhere and does not duplicate material already published. I confirm all authors consent to publication of this Work and authorise the granting of this licence.

## The Epidemiology of Chronic Pain in Children and Adolescents: A Protocol for a Systematic Review Update

Charlotte L. Langley<sup>1+</sup>, Perri R. Tutelman<sup>1,2+</sup>, Jennifer A. Parker<sup>1</sup>, Christine T. Chambers<sup>1,2,3\*</sup>,  
G. Allen Finley<sup>1,4</sup>, Darlene Chapman<sup>5</sup>, Gareth T. Jones<sup>6</sup>, Gary J. Macfarlane<sup>6</sup>,  
Justina Marianayagam<sup>7</sup>

<sup>1</sup>IWK Health Centre, Centre for Pediatric Pain Research, Halifax, NS Canada; <sup>2</sup>Dalhousie University, Department of Psychology and Neuroscience, Halifax, Canada; <sup>3</sup>Dalhousie University, Department of Pediatrics, Halifax, Canada; <sup>4</sup>Dalhousie University, Department of Anesthesia, Pain Management & Perioperative Medicine, Halifax, Canada; <sup>5</sup>IWK Health Centre, Health Sciences Library, IWK Health Centre; <sup>6</sup>University of Aberdeen, Epidemiology Group and Aberdeen Centre for Arthritis and Musculoskeletal Health, Aberdeen, Aberdeen, UK; <sup>7</sup>Patient Partner and Medical Student, Northern Ontario School of Medicine.

+CLL and PRT contributed equally to this article

\*Correspondence to:

Dr. Christine T. Chambers  
Centre for Pediatric Pain Research  
IWK Health Centre (K8536)  
5850/5980 University Ave  
Halifax, NS B3K 6R8, Canada.  
[christine.chambers@dal.ca](mailto:christine.chambers@dal.ca)

**Word Count:** 1770

## ABSTRACT

**Introduction:** Chronic pain, defined as persistent or recurring pain lasting longer than three months, is a common childhood problem and can profoundly impact children's physical, psychological, and social functioning. The last comprehensive systematic review estimating the prevalence of chronic pain in children and adolescents was published in 2011. Since then, the literature on pediatric chronic pain has grown substantially. This manuscript outlines a protocol for an updated systematic review to provide updated estimates of the prevalence of various forms of chronic pain in children and adolescence. The review will also examine the relationship between sociodemographic and psychosocial factors related to chronic pain prevalence.

**Methods and Analysis:** This review will follow PRISMA guidelines. We will search EMBASE, PubMed, CINAHL, and PsycINFO for observational studies published in English between 2009 and 2020 reporting population-based estimates of chronic non-disease-related pain prevalence in children or adolescents (age  $\leq 19$  years). Two independent reviewers will screen the titles and abstracts retrieved from the search based on predefined eligibility criteria. The full texts of relevant studies will then be assessed by two reviewers. Studies meeting inclusion criteria will be categorized according to the type of pain investigated: headache only, abdominal pain only, back pain only, musculoskeletal pain, combined pain, and other/general pain. Data will be extracted using customized forms and studies will be assessed for risk of bias using a 10-item tool developed by Hoy et al. (2012). A narrative synthesis will summarize the prevalence estimates of pediatric chronic pain and associated sociodemographic and psychosocial correlates. Meta-analyses and meta-regressions will be performed if the data permit.

**Ethics and dissemination:** Ethical approval is not required. Findings will be disseminated through publication in an academic journal, presentations at conferences, and in various media.

1  
2  
3 **PROSPERO registration number:** Submitted to PROSPERO on July 22, 2020. Currently  
4  
5 awaiting registration number.  
6  
7  
8  
9  
10  
11  
12  
13  
14  
15  
16  
17  
18  
19  
20  
21  
22  
23  
24  
25  
26  
27  
28  
29  
30  
31  
32  
33  
34  
35  
36  
37  
38  
39  
40  
41  
42  
43  
44  
45  
46  
47  
48  
49  
50  
51  
52  
53  
54  
55  
56  
57  
58  
59  
60

For peer review only

## STRENGTHS AND LIMITATIONS OF THIS STUDY

- This systematic review will provide updated estimates of the prevalence of various forms of chronic pain in children and adolescents.
- A comprehensive literature search will be conducted to identify eligible studies.
- This systematic review will follow the PRISMA guidelines and will assess included articles for risk of bias using a validated quality assessment tool.
- Heterogeneity in study methods and populations may limit our ability to pool the findings across studies.
- The findings of this review will enhance our understanding of the current burden of pediatric chronic pain which may help inform the treatment and allocation of clinical resources for this population.

## INTRODUCTION

Chronic pain, defined as persistent or recurring pain lasting longer than three months,[1] is a common problem in childhood. Although numerous recent population-based studies have provided estimates of the prevalence of chronic pain in children and adolescents, the reported proportions have varied considerably across studies. For example, the prevalence of primary headache disorders in children and adolescents in recent population-based studies has ranged from 19.4-66.4%,[2,3] while estimates of the prevalence of functional gastrointestinal disorders have varied from 4.6%-31.2%.[4,5] Due to the wide variability in the reported estimates, the current epidemiology of chronic pain in children and adolescents is unclear. The uncertainty regarding the number of children and adolescents impacted by chronic pain may limit the appropriate allocation of clinical services for this population, which are crucial given the pervasive and long-term consequences of chronic pain on young people.

Chronic pain can have a profound impact on children and adolescents. Children who experience chronic pain are at increased risk for depression and anxiety,[6,7] school absences,[8] social isolation,[9] and poorer quality of life.[10] Approximately 5% of children with chronic pain experience severe severe levels of pain which significantly impact their daily functioning.[11] Unfortunately, a substantial majority of children with chronic pain become adults with chronic pain. In a study of adult patients with chronic pain, 80% of participants reported their pain originated in childhood or adolescence.[12] The persistence of chronic pain from childhood to adulthood has significant social and economic consequences. For instance, children with chronic pain are at risk for opioid misuse[13] and psychiatric morbidity in adulthood,[14] and pediatric chronic pain is associated with high rates of outpatient appointments, emergency department visits, and hospitalizations all resulting in creased



1  
2  
3 healthcare costs.[15–17] The total annual cost of pediatric chronic pain in the United States is  
4  
5 estimated to be \$19.5 billion.[16] The significant individual, social and economic burden of  
6  
7 pediatric chronic pain, and its persistence into adulthood, demonstrates the importance of  
8  
9 understanding the epidemiology of this disease in order to improve treatment and reduce the  
10  
11 impact that chronic pain has on the lives of children and adolescents.  
12  
13

14  
15 The most recent, comprehensive review on the epidemiology of chronic pain in children and  
16  
17 adolescents was published 2011.[18] This review estimated that the median prevalence of  
18  
19 chronic pain in children and adolescents ranged from 11-38% depending on body site and study.  
20  
21 The prevalence of chronic pain was found to be higher in girls and prevalence proportions  
22  
23 increased with age.[18] The review identified several psychosocial correlates of chronic pain in  
24  
25 children and adolescents such as lower socio-economic status, anxiety, depression and low self-  
26  
27 esteem.[18] However, other correlates of chronic pain in children and adolescents, such as  
28  
29 sleep[19,20] and post-traumatic stress disorder,[21,22] have since been identified and were not  
30  
31 consistently examined at the population level at the time of the past review. The review also  
32  
33 identified several gaps in the understanding of the epidemiology of chronic pain in children and  
34  
35 adolescents, including restricted age ranges and lack of longitudinal studies.[18] Furthermore, at  
36  
37 the time of the past review the quality of included studies was generally low to moderate and  
38  
39 methodological limitations, such as inconsistent definitions of pain between studies, made it  
40  
41 difficult to estimate overall prevalence proportions.[18]  
42  
43  
44  
45

46  
47 The literature on pediatric pain is growing exponentially; a recent bibliometric analysis  
48  
49 revealed that there was nearly a 40-fold increase in the number of publications on pediatric pain  
50  
51 from 1975 to 2010.[23] Since the last comprehensive systematic review on the epidemiology of  
52  
53 chronic pain in children and adolescents,[18] numerous population-based studies estimating the  
54  
55  
56  
57  
58  
59  
60

1  
2  
3 prevalence of various forms of pediatric chronic pain have been published.[24–26] A few recent  
4  
5 reviews estimating the prevalence of certain forms of chronic pain, such as functional abdominal  
6  
7 pain[27] and headache[28,29] have also been conducted. However, in order to appropriately  
8  
9 meet the clinical needs of children and adolescents with chronic pain, an updated review that  
10  
11 estimates the proportion of various forms of chronic pain and examines key sociodemographic  
12  
13 and psychosocial correlates of chronic pain in children and adolescents is needed.  
14  
15

16  
17 This manuscript outlines a protocol for a systematic review to update a prior review  
18  
19 synthesizing the published literature on the prevalence of chronic pain in children and  
20  
21 adolescents. Specifically, the objectives of this review are to: 1) Provide updated estimates of the  
22  
23 prevalence of various forms of chronic pain (headache, abdominal pain, back pain,  
24  
25 musculoskeletal pain, combined pain, and other/general pain) in children and adolescence; 2)  
26  
27 Provide an updated examination of sociodemographic (e.g., age, sex, race) and psychosocial  
28  
29 (e.g., anxiety, depression, sleep) factors related to the prevalence of chronic pain in children; and  
30  
31 3) Assess study quality and identify gaps in the literature and areas for future research.  
32  
33

### 34 35 **METHODS AND ANALYSIS**

36  
37 This systematic review protocol was prepared in accordance with the Preferred Reporting  
38  
39 Items for Systematic Reviews and Meta-Analyses Protocols (PRISMA-P) guidelines (see  
40  
41 supplementary file 1).[30] The study protocol was submitted for registration with the  
42  
43 International Prospective Register of Systematic Reviews (PROSPERO) on July 22, 2020. In the  
44  
45 event of an amendment to this protocol, the date of the amendment, a description of the change  
46  
47 and the rationale will be documented and recorded in PROSPERO. The dates for this review are  
48  
49 May 14, 2020-April 1, 2021(expected).  
50  
51

#### 52 53 **Search strategy**

We will search the following electronic databases: EMBASE, PubMed, CINAHL and PsycINFO. The search terms will be comprised of three conceptual blocks: i) Pain terms (e.g., musculoskeletal pain, back pain, headache, abdominal pain, recurrent pain); ii) Pediatric terms (e.g., child, adolescent, boy, girl); and iii) Epidemiological terms (e.g., epidemiology, prevalence, incidence, frequency). The searches will be restricted to English language articles, human studies, and manuscripts published between January 2009-June 2020 (the original systematic review[31] included studies published up until 2009).

### **Eligibility criteria**

Studies will be eligible for inclusion if they meet the following criteria:

1. Observational studies (epidemiological, case-control, cross-sectional, retrospective and prospective cohort studies) using a population-based sampling frame to estimate the prevalence of chronic pain, defined as pain lasting 3 months or longer, in children or adolescents (study sample age  $\leq 19$  years).
2. Studies published in peer-reviewed journals in English.

Studies meeting the following criteria will be excluded:

1. Studies with sampling frames not deemed to be population-based.
2. Case studies, conference abstracts, dissertations, reviews, book chapters and qualitative studies.
3. Studies reporting on the prevalence of chronic pain in adults (sample age is exclusively  $\geq 20$  years)
4. Studies of non-human samples.

- 1  
2  
3 5. Studies exclusively examining the prevalence of disease- (e.g., cancer, arthritis) or  
4 condition- (e.g., cerebral palsy, muscular dystrophy) related chronic pain in children and  
5 adolescents.  
6  
7  
8  
9

10 Studies reporting on multiple populations (e.g., disease/condition and non-disease/condition-  
11 related chronic pain, adults and children), where data on one or more sub-populations that fit the  
12 eligibility criteria for this review can be separately identified, will be included and the relevant  
13 data will be extracted.  
14  
15  
16  
17  
18

### 19 **Screening and Data Extraction**

20  
21 Literature search results will be transferred to Covidence systematic review management  
22 software and duplicates will be removed. An initial title/abstract review of studies retrieved by  
23 the search will be independently conducted by two members of the study team to determine  
24 which studies potentially met the inclusion/exclusion criteria. Articles included from the  
25 title/abstract review phase will then be reviewed in full by two reviewers. The two reviewers will  
26 be blinded to each other's decisions. Discrepancies regarding the eligibility of a study will be  
27 resolved by consensus, and if necessary, through discussion with a third reviewer.  
28  
29  
30  
31  
32  
33  
34  
35  
36  
37

38 Data will be extracted from included studies using customized forms. Extracted  
39 information will include study design, location where the study was conducted, number of  
40 participants, participant demographics (e.g., age, sex, race), study sample (e.g., headache only,  
41 abdominal pain only, back pain only, musculoskeletal pain, combined pain, and other/general.),  
42 study methodology, prevalence proportion of chronic pain, and sociodemographic (e.g., age, sex,  
43 race, parent education, household income) and psychosocial (e.g., anxiety, depression, sleep,  
44 post-traumatic stress) predictors of chronic pain. In accordance with the PRISMA guidelines  
45  
46  
47  
48  
49  
50  
51  
52  
53  
54  
55  
56  
57  
58  
59  
60

1  
2  
3 [32], the number of studies meeting inclusion criteria will be recorded and the reason for  
4  
5 exclusion of those not included will be documented.  
6

### 7 8 **Quality Assessment** 9

10 Two independent reviewers will assess study quality using the 10-item tool developed by  
11  
12 Hoy et al. (2012). This tool was developed to assess external and internal validity of prevalence  
13  
14 studies.[33] Response options for each item are either “yes” (indicating low risk of bias) or “no”  
15  
16 (indicating high risk of bias).[33] The tool will be adapted for this review if necessary.  
17  
18 Consensus will be reached by discussion between the reviewers.  
19  
20

### 21 22 **Data Synthesis** 23

24 A narrative synthesis will summarize the prevalence proportions of chronic pain in  
25  
26 children and adolescents in the following categories; headache only; abdominal pain only; back  
27  
28 pain only; musculoskeletal pain; combined pain; and other/general pain. Additionally, the  
29  
30 relationship between psychosocial factors (e.g., sleep, anxiety and depression) and  
31  
32 sociodemographic factors (e.g., sex, age, race and indicators of socio-economic status such as,  
33  
34 but not limited to, household income, parental level of education and urban versus rural area of  
35  
36 residence) and chronic pain in children and adolescents will be reviewed.  
37  
38  
39

40 Depending on the heterogeneity of included studies the prevalence proportions of chronic  
41  
42 pain will be calculated using median prevalence proportions and/or meta-analysis. When at least  
43  
44 two or more studies are comparable in terms of the study sample (e.g., category of chronic pain),  
45  
46 and methodology (e.g., operationalization of chronic pain), we will pool the effects to determine  
47  
48 the prevalence proportion of chronic pain across studies. Similarly, if studies have used similar  
49  
50 methods to examine the relationship between certain sociodemographic and/or psychosocial  
51  
52  
53  
54  
55  
56  
57  
58  
59  
60

1  
2  
3 variables in comparable chronic pain samples, we will conduct separate meta-regressions to  
4  
5 examine the relationship between these variables and chronic pain across studies.  
6

7  
8 Reporting of this systematic review will follow PRISMA guidelines.[34] A PRISMA  
9  
10 flow diagram will be included in the final manuscript of this review.  
11

## 12 **Ethics and Dissemination**

13  
14 Ethical approval will not be sought for this study, as no human subject participants will  
15  
16 be involved. A manuscript outlining the results of this review will be submitted for publication in  
17  
18 a peer-reviewed academic journal and for presentation at relevant academic conferences. Results  
19  
20 will be publicly disseminated through social media, news and media outlets, and newsletters and  
21  
22 blog posts, as appropriate.  
23  
24

## 25 **IMPLICATIONS OF THE REVIEW**

26  
27 We anticipate that the results from this review will enhance our understanding of the  
28  
29 current burden of pediatric chronic pain which may help inform treatment and allocation of  
30  
31 clinical resources for this population. Furthermore, findings from this study will identify priority  
32  
33 areas for research on the epidemiology of chronic pain to guide future research efforts. Through  
34  
35 our planned knowledge translation efforts, findings of the review will be disseminated not only  
36  
37 to clinicians and scientists, but also to patients and families, which may aid in public awareness  
38  
39 and advocacy efforts.  
40  
41  
42  
43

## 44 **PATIENT AND PUBLIC INVOLVEMENT**

45  
46 This protocol was designed in collaboration with a patient partner and co-author, JM. JM  
47  
48 will remain involved as a patient partner throughout all steps of the review.  
49  
50

## 51 **CONTRIBUTORS**

1  
2  
3 CTC conceived the study idea. CL, PRT and JAP designed the study protocol, data  
4 extraction, and statistical analysis and wrote the first draft of the manuscript. DC, GAF, GTJ,  
5  
6 GJM and JM provided critical insights. All authors approved and contributed to the final  
7  
8  
9  
10 manuscript.

### 11 12 **FUNDING**

13  
14 This work was supported by an operating grant from the Canadian Institutes of Health  
15  
16 Research (FRN167902) awarded to CTC. CTC is also supported by a Tier 1 Canada Research  
17  
18 Chair with infrastructure support from the Canada Foundation for Innovation. CL is supported by  
19  
20 an IWK Health Centre Summer Studentship [1025420]. PRT is supported by a Research Nova  
21  
22 Scotia Scholars Award, a Nova Scotia Graduate Scholarship, and an IWK Graduate Studentship  
23  
24  
25  
26 Award.

### 27 28 **COMPETING INTERESTS**

29  
30  
31 None declared.

### 32 33 **PATIENT CONSENT FOR PUBLICATION**

34  
35  
36 Not required.  
37  
38  
39  
40  
41  
42  
43  
44  
45  
46  
47  
48  
49  
50  
51  
52  
53  
54  
55  
56  
57  
58  
59  
60

## REFERENCES

- 1 Treede R-D, Rief W, Barke A, *et al.* A classification of chronic pain for ICD-11. *PAIN* 2015;**156**:1. doi:10.1097/j.pain.000000000000160
- 2 Al-Hashel JY, Ahmed SF, Alroughani R. Prevalence and burden of primary headache disorders in Kuwaiti children and adolescents: A community based study. *Front Neurol* 2019;**10**:793. doi:10.3389/fneur.2019.00793
- 3 Malik AH, Shah PA, Yaseen Y. Prevalence of primary headache disorders in school-going children in Kashmir Valley (North-west India). *Ann Indian Acad Neurol* 2012;**15**:100–3. doi:10.4103/0972-2327.100030
- 4 Zheng S, Fu W, Zhou J, *et al.* Prevalence and related factors of irritable bowel syndrome among middle-school students in areas affected by Wenchuan earthquake: An epidemiological study. *J. Clin. Gastroenterol.* 2012;**46**:345–6. doi:10.1097/MCG.0b013e31824712d0
- 5 Demirceken FG, Kurt G, Dulkadir R, *et al.* Functional dyspepsia in children: A Turkish prospective survey in Kirikkale province. 2010.
- 6 Shelby GD, Shirkey KC, Sherman AL, *et al.* Functional abdominal pain in childhood and long-term vulnerability to anxiety disorders. *Pediatrics* 2013;**132**:475–82. doi:10.1542/peds.2012-2191
- 7 Simons LE, Sieberg CB, Claar RL. Anxiety and impairment in a large sample of children and adolescents with chronic pain. *Pain Res Manag* 2012;**17**:93–7. doi:10.1155/2012/420676
- 8 Logan DE, Gray LS, Iversen CN, *et al.* School Self-Concept in Adolescents With Chronic Pain. *J Pediatr Psychol* 2017;**42**:892–901. doi:10.1093/jpepsy/jsx063



- 1  
2  
3 9 Maes M, Van den Noortgate W, Fustolo-Gunnink SF, *et al.* Loneliness in Children and  
4 Adolescents With Chronic Physical Conditions: A Meta-Analysis. *J Pediatr Psychol*  
5 2017;**42**:622–35. doi:10.1093/jpepsy/jsx046  
6  
7  
8  
9  
10 10 Gold JI, Yetwin AK, Mahrer NE, *et al.* Pediatric Chronic Pain and Health-Related Quality of  
11 Life. *J Pediatr Nurs* 2009;**24**:141–50. doi:10.1016/j.pedn.2008.07.003  
12  
13  
14  
15 11 Huguet A, Miró J. The Severity of Chronic Pediatric Pain: An Epidemiological Study. *J Pain*  
16 2008;**9**:226–36. doi:10.1016/j.jpain.2007.10.015  
17  
18  
19  
20 12 Hassett AL, Hilliard PE, Goesling J, *et al.* Reports of chronic pain in childhood and  
21 adolescence among patients at a tertiary care pain clinic. *J Pain* 2013;**14**:1390–7.  
22 doi:10.1016/j.jpain.2013.06.010  
23  
24  
25  
26 13 Groenewald CB, Law EF, Fisher E, *et al.* Associations Between Adolescent Chronic Pain  
27 and Prescription Opioid Misuse in Adulthood. *J Pain* 2019;**20**:28–37.  
28 doi:10.1016/j.jpain.2018.07.007  
29  
30  
31  
32  
33 14 Noel M, Groenewald CB, Beals-Erickson SE, *et al.* Chronic Pain in Adolescence and  
34 Internalizing Mental Health Disorders: A Nationally Representative Study. *Pain*  
35 2016;**157**:1333–8. doi:10.1097/j.pain.0000000000000522  
36  
37  
38  
39  
40 15 Ho IK, Goldschneider KR, Kashikar-Zuck S, *et al.* Healthcare Utilization and Indirect  
41 Burden among Families of Pediatric Patients with Chronic Pain. *J Musculoskelet Pain*  
42 2008;**16**:155–64. doi:10.1080/10582450802161853  
43  
44  
45  
46  
47 16 Groenewald CB, Essner BS, Wright D, *et al.* The economic costs of chronic pain among a  
48 cohort of treatment-seeking adolescents in the United States. *J Pain* 2014;**15**:925–33.  
49 doi:10.1016/j.jpain.2014.06.002  
50  
51  
52  
53  
54  
55  
56  
57  
58  
59  
60

- 1  
2  
3 17 Tumin D, Drees D, Miller R, *et al.* Health Care Utilization and Costs Associated With  
4 Pediatric Chronic Pain. *J Pain* 2018;**19**:973–82. doi:10.1016/j.jpain.2018.03.012  
5  
6  
7  
8 18 King S, Chambers CT, Huguet A, *et al.* The epidemiology of chronic pain in children and  
9 adolescents revisited: A systematic review. *Pain* 2011;**152**:2729–38.  
10  
11  
12 doi:10.1016/j.pain.2011.07.016  
13  
14  
15 19 Evans S, Djilas V, Seidman LC, *et al.* Sleep Quality, Affect, Pain, and Disability in Children  
16 With Chronic Pain: Is Affect a Mediator or Moderator? *J Pain* 2017;**18**:1087–95.  
17  
18  
19 doi:10.1016/j.jpain.2017.04.007  
20  
21  
22 20 Murphy LK, Palermo TM, Tham SW, *et al.* Comorbid Sleep Disturbance in Adolescents  
23 with Functional Abdominal Pain. *Behav Sleep Med* 2020;**0**:1–10.  
24  
25  
26 doi:10.1080/15402002.2020.1781634  
27  
28  
29 21 Noel M, Wilson AC, Holley AL, *et al.* Posttraumatic stress disorder symptoms in youth with  
30 vs without chronic pain. *Pain* 2016;**157**:2277–84. doi:10.1097/j.pain.0000000000000642  
31  
32  
33 22 Stahlschmidt L, Rosenkranz F, Dobe M, *et al.* Posttraumatic stress disorder in children and  
34 adolescents with chronic pain. *Health Psychol* 2020;**39**:463–70. doi:10.1037/hea0000859  
35  
36  
37  
38 23 Caes L, Boerner KE, Chambers CT, *et al.* A comprehensive categorical and bibliometric  
39 analysis of published research articles on pediatric pain from 1975 to 2010. *Pain*.  
40  
41  
42 2016;**157**:302–13. doi:10.1097/j.pain.0000000000000403  
43  
44  
45 24 Oswari H, Alatas FS, Hegar B, *et al.* Functional abdominal pain disorders in adolescents in  
46 Indonesia and their association with family related stress. *BMC Pediatr* 2019;**19**:342–5.  
47  
48  
49 doi:10.1186/s12887-019-1682-5 [doi]  
50  
51  
52  
53  
54  
55  
56  
57  
58  
59  
60

- 1  
2  
3 25 Aartun E, Hartvigsen J, Wedderkopp N, *et al.* Spinal pain in adolescents: prevalence,  
4 incidence, and course: a school-based two-year prospective cohort study in 1,300 Danes aged  
5 11–13. *BMC Musculoskelet Disord* 2014;**15**:187. doi:10.1186/1471-2474-15-187  
6  
7  
8  
9  
10 26 Arruda MA, Arruda R, Guidetti V, *et al.* Psychosocial adjustment of children with migraine  
11 and tension-type headache - a nationwide study. *Headache* 2015;**55 Suppl 1**:39–50.  
12  
13  
14  
15  
16  
17 27 Korterink JJ, Diederens K, Benninga MA, *et al.* Epidemiology of Pediatric Functional  
18 Abdominal Pain Disorders: A Meta-Analysis. *PLOS ONE* 2015;**10**:e0126982–e0126982.  
19  
20  
21  
22  
23  
24 28 Albers L, von Kries R, Heinen F, *et al.* Headache in School Children: Is the Prevalence  
25 Increasing? *Curr Pain Headache Rep* 2015;**19**:4. doi:10.1007/s11916-015-0477-0  
26  
27  
28 29 Wöber-Bingöl Ç. Epidemiology of migraine and headache in children and adolescents  
29 topical collection on childhood and adolescent headache. *Curr Pain Headache Rep*  
30  
31  
32  
33  
34  
35 30 Moher D, Shamseer L, Clarke M, *et al.* Preferred reporting items for systematic review and  
36 meta-analysis protocols (PRISMA-P) 2015 statement. *Rev Espanola Nutr Humana Diet*  
37  
38  
39  
40  
41  
42 31 King S, Chambers CT, Huguet A, *et al.* The epidemiology of chronic pain in children and  
43 adolescents revisited: A systematic review. *Pain* 2011;**152**:2729–38.  
44  
45  
46  
47  
48  
49 32 Moher D, Liberati A, Tetzlaff J, *et al.* Preferred reporting items for systematic reviews and  
50 meta-analyses: The PRISMA statement. *PLoS Med.* 2009;**6**.  
51  
52  
53  
54  
55  
56  
57  
58  
59  
60

- 1  
2  
3 33 Hoy D, Brooks P, Woolf A, *et al.* Assessing risk of bias in prevalence studies: Modification  
4 of an existing tool and evidence of interrater agreement. *J Clin Epidemiol* 2012;**65**:934–9.  
5  
6 doi:10.1016/j.jclinepi.2011.11.014  
7  
8  
9  
10 34 Moher D, Liberati A, Tetzlaff J, *et al.* Preferred reporting items for systematic reviews and  
11 meta-analyses: The PRISMA statement. *PLoS Med.* 2009;**6**.  
12  
13 doi:10.1371/journal.pmed.1000097  
14  
15  
16  
17  
18  
19  
20  
21  
22  
23  
24  
25  
26  
27  
28  
29  
30  
31  
32  
33  
34  
35  
36  
37  
38  
39  
40  
41  
42  
43  
44  
45  
46  
47  
48  
49  
50  
51  
52  
53  
54  
55  
56  
57  
58  
59  
60

Additional file 1: PRISMA-P (Preferred Reporting Items for Systematic review and Meta-Analysis Protocols) 2015 checklist: recommended items to address in a systematic review protocol

### PRISMA Protocol Checklist

| Section and topic                 | Item No | Checklist                                                                                                                                                                                       | Reporting. Page No |
|-----------------------------------|---------|-------------------------------------------------------------------------------------------------------------------------------------------------------------------------------------------------|--------------------|
| <b>ADMINISTRATIVE INFORMATION</b> |         |                                                                                                                                                                                                 |                    |
| Title:                            |         |                                                                                                                                                                                                 |                    |
| Identification                    | 1a      | Identify the report as a protocol of a systematic review                                                                                                                                        | 1                  |
| Update                            | 1b      | If the protocol is for an update of a previous systematic review, identify as such                                                                                                              | 1,3                |
| Registration                      | 2       | If registered, provide the name of the registry (e.g., PROSPERO) and registration number                                                                                                        | 3                  |
| Authors:                          |         |                                                                                                                                                                                                 |                    |
| Contact                           | 3a      | Provide name, institutional affiliation, and e-mail address of all protocol authors; provide physical mailing address of corresponding author                                                   | 1                  |
| Contributions                     | 3b      | Describe contributions of protocol authors and identify the guarantor of the review                                                                                                             | 12                 |
| Amendments                        | 4       | If the protocol represents an amendment of a previously completed or published protocol, identify as such and list changes; otherwise, state plan for documenting important protocol amendments | 7                  |
| Support:                          |         |                                                                                                                                                                                                 |                    |
| Sources                           | 5a      | Indicate sources of financial or other support for the review                                                                                                                                   | 12                 |
| Sponsor                           | 5b      | Provide name for the review funder and/or sponsor Role of sponsor/ funder                                                                                                                       | N/A                |
| Role of sponsor or funder         | 5c      | Describe roles of funder(s), sponsor(s), and/or institution(s), if any, in developing the protocol                                                                                              | N/A                |
| <b>INTRODUCTION</b>               |         |                                                                                                                                                                                                 |                    |
| Rationale                         | 6       | Describe the rationale for the review in the context of what is already known                                                                                                                   | 5-7                |
| Objectives                        | 7       | Provide an explicit statement of the question(s) the review will address with reference to participants, interventions, comparators, and outcomes (PICO)                                        | 7                  |
| <b>METHODS</b>                    |         |                                                                                                                                                                                                 |                    |
| Eligibility criteria              | 8       | Specify the study characteristics (e.g., PICO, study design, setting, time frame) and report characteristics (e.g., years                                                                       | 8-9                |

|                                    |     |                                                                                                                                                                                                                                                      |                                    |
|------------------------------------|-----|------------------------------------------------------------------------------------------------------------------------------------------------------------------------------------------------------------------------------------------------------|------------------------------------|
|                                    |     | considered, language, publication status) to be used as criteria for eligibility for the review                                                                                                                                                      |                                    |
| Information sources                | 9   | Describe all intended information sources (e.g., electronic databases, contact with study authors, trial registers, or other grey literature sources) with planned dates of coverage                                                                 | 7,8                                |
| Search Strategy                    | 10  | Present draft of search strategy to be used for at least one electronic database, including planned limits, such that it could be repeated                                                                                                           | To be included in final manuscript |
| Study Records                      |     |                                                                                                                                                                                                                                                      |                                    |
|                                    | 11a | Describe the mechanism(s) that will be used to manage records and data throughout the review                                                                                                                                                         | 9                                  |
|                                    | 11b | State the process that will be used for selecting studies (e.g., two independent reviewers) through each phase of the review (i.e., screening, eligibility, and inclusion in meta-analysis)                                                          | 9-11                               |
|                                    | 11c | Describe planned method of extracting data from reports (e.g., piloting forms, done independently, in duplicate), any processes for obtaining and confirming data from investigators                                                                 | 9-11                               |
| Data items                         | 12  | List and define all variables for which data will be sought (e.g., PICO items, funding sources), any pre-planned data assumptions and simplifications                                                                                                | 9,10                               |
| Outcomes and prioritization        | 13  | List and define all outcomes for which data will be sought, including prioritization of main and additional outcomes, with rationale                                                                                                                 | 9-11                               |
| Risk of bias in individual studies | 14  | Describe anticipated methods for assessing risk of bias of individual studies, including whether this will be done at the outcome or study level, or both; state how this information will be used in data synthesis                                 | 10                                 |
| Data synthesis                     |     |                                                                                                                                                                                                                                                      |                                    |
|                                    | 15a | Describe criteria under which study data will be quantitatively synthesized                                                                                                                                                                          | 10,11                              |
|                                    | 15b | If data are appropriate for quantitative synthesis, describe planned summary measures, methods of handling data, and methods of combining data from studies, including any planned exploration of consistency (e.g., I <sup>2</sup> , Kendall's tau) | 10,11                              |
|                                    | 15c | Describe any proposed additional analyses (e.g., sensitivity or subgroup analyses, meta-regression)                                                                                                                                                  | 10,11                              |
|                                    | 15d | If quantitative synthesis is not appropriate, describe the type of summary planned                                                                                                                                                                   | 10                                 |

|                                   |    |                                                                                                                             |     |
|-----------------------------------|----|-----------------------------------------------------------------------------------------------------------------------------|-----|
| Meta-bias(es)                     | 16 | Specify any planned assessment of meta-bias(es) (e.g., publication bias across studies, selective reporting within studies) | N/A |
| Confidence in cumulative evidence | 17 | Describe how the strength of the body of evidence will be assessed (e.g., GRADE)                                            | N/A |

From: Shamseer L, Moher D, Clarke M, Ghersi D, Liberati A, Petticrew M, Shekelle P, Stewart L, PRISMA-P Group. Preferred reporting items for systematic review and meta-analysis protocols (PRISMA-P) 2015: elaboration and explanation. *BMJ*. 2015 Jan 2;349(jan02 1):g7647.

# BMJ Open

## The Epidemiology of Chronic Pain in Children and Adolescents: A Protocol for a Systematic Review Update

|                                 |                                                                                                                                                                                                                                                                                                                                                                                                                                                                                                                                                                                                                                                                                                                                                                                                                                                                                                                                                                                                                           |
|---------------------------------|---------------------------------------------------------------------------------------------------------------------------------------------------------------------------------------------------------------------------------------------------------------------------------------------------------------------------------------------------------------------------------------------------------------------------------------------------------------------------------------------------------------------------------------------------------------------------------------------------------------------------------------------------------------------------------------------------------------------------------------------------------------------------------------------------------------------------------------------------------------------------------------------------------------------------------------------------------------------------------------------------------------------------|
| Journal:                        | <i>BMJ Open</i>                                                                                                                                                                                                                                                                                                                                                                                                                                                                                                                                                                                                                                                                                                                                                                                                                                                                                                                                                                                                           |
| Manuscript ID                   | bmjopen-2020-043675.R1                                                                                                                                                                                                                                                                                                                                                                                                                                                                                                                                                                                                                                                                                                                                                                                                                                                                                                                                                                                                    |
| Article Type:                   | Protocol                                                                                                                                                                                                                                                                                                                                                                                                                                                                                                                                                                                                                                                                                                                                                                                                                                                                                                                                                                                                                  |
| Date Submitted by the Author:   | 28-Dec-2020                                                                                                                                                                                                                                                                                                                                                                                                                                                                                                                                                                                                                                                                                                                                                                                                                                                                                                                                                                                                               |
| Complete List of Authors:       | Tutelman, Perri; Dalhousie University, Department of Psychology and Neuroscience; IWK Health Centre, Centre for Pediatric Pain Research<br>Langley, Charlotte; IWK Health Centre, Centre for Pediatric Pain Research<br>Chambers, Christine; Dalhousie University, Department of Psychology; IWK Health Centre, Centre for Pediatric Pain Research<br>Parker, Jennifer; IWK Health Centre, Centre for Pediatric Pain Research<br>Finley, Allen; Dalhousie University, Department of Anesthesia, Pain Management & Perioperative Medicine; IWK Health Centre, Centre for Pediatric Pain Research<br>Chapman, Darlene; IWK Health Centre, Health Sciences Library<br>Jones, Gareth; University of Aberdeen, Epidemiology Group and Aberdeen Centre for Arthritis and Musculoskeletal Health<br>Macfarlane, Gary; University of Aberdeen, Epidemiology Group and Aberdeen Centre for Arthritis and Musculoskeletal Health<br>Marianayagam, Justina; Patient Partner and Medical Student; Northern Ontario School of Medicine |
| <b>Primary Subject Heading</b>: | Paediatrics                                                                                                                                                                                                                                                                                                                                                                                                                                                                                                                                                                                                                                                                                                                                                                                                                                                                                                                                                                                                               |
| Secondary Subject Heading:      | Epidemiology                                                                                                                                                                                                                                                                                                                                                                                                                                                                                                                                                                                                                                                                                                                                                                                                                                                                                                                                                                                                              |
| Keywords:                       | EPIDEMIOLOGY, PAEDIATRICS, PAIN MANAGEMENT                                                                                                                                                                                                                                                                                                                                                                                                                                                                                                                                                                                                                                                                                                                                                                                                                                                                                                                                                                                |
|                                 |                                                                                                                                                                                                                                                                                                                                                                                                                                                                                                                                                                                                                                                                                                                                                                                                                                                                                                                                                                                                                           |

SCHOLARONE™  
Manuscripts





I, the Submitting Author has the right to grant and does grant on behalf of all authors of the Work (as defined in the below author licence), an exclusive licence and/or a non-exclusive licence for contributions from authors who are: i) UK Crown employees; ii) where BMJ has agreed a CC-BY licence shall apply, and/or iii) in accordance with the terms applicable for US Federal Government officers or employees acting as part of their official duties; on a worldwide, perpetual, irrevocable, royalty-free basis to BMJ Publishing Group Ltd ("BMJ") its licensees and where the relevant Journal is co-owned by BMJ to the co-owners of the Journal, to publish the Work in this journal and any other BMJ products and to exploit all rights, as set out in our [licence](#).

The Submitting Author accepts and understands that any supply made under these terms is made by BMJ to the Submitting Author unless you are acting as an employee on behalf of your employer or a postgraduate student of an affiliated institution which is paying any applicable article publishing charge ("APC") for Open Access articles. Where the Submitting Author wishes to make the Work available on an Open Access basis (and intends to pay the relevant APC), the terms of reuse of such Open Access shall be governed by a Creative Commons licence – details of these licences and which [Creative Commons](#) licence will apply to this Work are set out in our licence referred to above.

Other than as permitted in any relevant BMJ Author's Self Archiving Policies, I confirm this Work has not been accepted for publication elsewhere, is not being considered for publication elsewhere and does not duplicate material already published. I confirm all authors consent to publication of this Work and authorise the granting of this licence.

## The Epidemiology of Chronic Pain in Children and Adolescents: A Protocol for a Systematic Review Update

Perri R. Tutelman<sup>1,2</sup>, Charlotte L. Langley<sup>1</sup>, Christine T. Chambers<sup>1,2,3\*</sup>, Jennifer A. Parker<sup>1</sup>, G. Allen Finley<sup>1,4</sup>, Darlene Chapman<sup>5</sup>, Gareth T. Jones<sup>6</sup>, Gary J. Macfarlane<sup>6</sup>, Justina Marianayagam<sup>7</sup>

<sup>1</sup>IWK Health Centre, Centre for Pediatric Pain Research, Halifax, NS Canada; <sup>2</sup>Dalhousie University, Department of Psychology and Neuroscience, Halifax, Canada; <sup>3</sup>Dalhousie University, Department of Pediatrics, Halifax, Canada; <sup>4</sup>Dalhousie University, Department of Anesthesia, Pain Management & Perioperative Medicine, Halifax, Canada; <sup>5</sup>IWK Health Centre, Health Sciences Library, IWK Health Centre; <sup>6</sup>University of Aberdeen, Epidemiology Group and Aberdeen Centre for Arthritis and Musculoskeletal Health, Aberdeen, Aberdeen, UK; <sup>7</sup>Patient Partner and Medical Student, Northern Ontario School of Medicine.

\*Correspondence to:

Dr. Christine T. Chambers  
Centre for Pediatric Pain Research  
IWK Health Centre (K8536)  
5850/5980 University Ave  
Halifax, NS B3K 6R8, Canada  
[christine.chambers@dal.ca](mailto:christine.chambers@dal.ca)

**Word Count:** 1892

## ABSTRACT

**Introduction:** Chronic pain, defined as persistent or recurring pain or pain lasting longer than three months, is a common childhood problem and can profoundly impact children's physical, psychological, and social functioning. The last comprehensive systematic review estimating the prevalence of chronic pain in children and adolescents was published in 2011. Since then, the literature on pediatric chronic pain has grown substantially. This manuscript outlines a protocol for an updated systematic review to provide updated estimates of the prevalence of various forms of chronic pain in children and adolescence. The review will also examine the relationship between sociodemographic and psychosocial factors related to chronic pain prevalence.

**Methods and Analysis:** This review will follow PRISMA guidelines. We will search EMBASE, PubMed, CINAHL, and PsycINFO for observational studies published in English between 2009 and 2020 reporting population-based estimates of chronic non-disease-related pain prevalence in children or adolescents (age  $\leq 19$  years). Two independent reviewers will screen the titles and abstracts retrieved from the search based on predefined eligibility criteria. The full texts of relevant studies will then be assessed by two reviewers. Studies meeting inclusion criteria will be categorized according to the type of pain investigated: headache only, abdominal pain only, back pain only, musculoskeletal pain, combined pain, general pain, and other pain. Data will be extracted using customized forms and studies will be assessed for risk of bias using a 10-item tool developed by Hoy et al. (2012). A narrative synthesis will summarize the prevalence estimates of pediatric chronic pain and associated sociodemographic and psychosocial correlates. Meta-analyses and meta-regressions will be performed if the data permit.

**Ethics and dissemination:** Ethical approval is not required. Findings will be disseminated through publication in an academic journal, presentations at conferences, and in various media.

1  
2  
3 **PROSPERO registration number: CRD42020198690**  
4  
5  
6  
7  
8  
9  
10  
11  
12  
13  
14  
15  
16  
17  
18  
19  
20  
21  
22  
23  
24  
25  
26  
27  
28  
29  
30  
31  
32  
33  
34  
35  
36  
37  
38  
39  
40  
41  
42  
43  
44  
45  
46  
47  
48  
49  
50  
51  
52  
53  
54  
55  
56  
57  
58  
59  
60

For peer review only

## STRENGTHS AND LIMITATIONS OF THIS STUDY

- This systematic review will provide updated estimates of the prevalence of various forms of chronic pain in children and adolescents.
- A comprehensive literature search will be conducted to identify eligible studies.
- This systematic review will follow the PRISMA guidelines and will assess included articles for risk of bias using a validated quality assessment tool.
- Heterogeneity in study methods and populations may limit our ability to pool the findings across studies.
- The findings of this review will enhance our understanding of the current burden of pediatric chronic pain which may help inform the treatment and allocation of clinical resources for this population.

## INTRODUCTION

Chronic pain, often defined as persistent or recurring pain or pain lasting longer than three months,[1] is a common problem in childhood. Although numerous recent population-based studies have provided estimates of the prevalence of chronic pain in children and adolescents, the reported proportions have varied considerably across studies. For example, the prevalence of primary headache disorders in children and adolescents in recent population-based studies has ranged from 19.4-66.4%,[2,3] while estimates of the prevalence of functional gastrointestinal disorders have varied from 4.6%-31.2%.[4,5] Due to the wide variability in the reported estimates, the current epidemiology of chronic pain in children and adolescents is unclear. The uncertainty regarding the number of children and adolescents impacted by chronic pain may limit the appropriate allocation of clinical services for this population, which are crucial given the pervasive and long-term consequences of chronic pain on young people.

Chronic pain can have a profound impact on children and adolescents. Children who experience chronic pain are at increased risk for depression and anxiety,[6,7] school absences,[8] social isolation,[9] and poorer quality of life.[10] Approximately 5% of children with chronic pain experience severe levels of pain which significantly impact their daily functioning.[11] Unfortunately, many children with chronic pain become adults with chronic pain. In a prospective study of pediatric patients with functional abdominal pain, 35% continued to report recurrent abdominal symptoms when reassessed in adulthood.[12] Similarly, in 14-year follow up study of adolescents with frequent headaches, 19% continued to report weekly headaches in young adulthood.[13] These rates are similar to retrospective reports of chronic pain in childhood by adults with chronic pain. In a study of adult patients with chronic pain, 17% of participants reported their pain originated in childhood or adolescence. [14]

1  
2  
3 The persistence of chronic pain from childhood to adulthood has significant social and  
4 economic consequences. For instance, children with chronic pain are at risk for opioid  
5 misuse[15] and psychiatric morbidity in adulthood,[16] and pediatric chronic pain is associated  
6 with high rates of outpatient appointments, emergency department visits, and hospitalizations all  
7 resulting in creased healthcare costs.[17–19] The total annual cost of pediatric chronic pain in  
8 the United States is estimated to be \$19.5 billion.[18] The significant individual, social and  
9 economic burden of pediatric chronic pain, and its persistence into adulthood, demonstrates the  
10 importance of understanding the epidemiology of this disease in order to improve treatment and  
11 reduce the impact that chronic pain has on the lives of children and adolescents.  
12  
13  
14  
15  
16  
17  
18  
19  
20  
21  
22  
23

24 The most recent, comprehensive review on the epidemiology of chronic pain in children and  
25 adolescents was published 2011.[20] This review estimated that the median prevalence of  
26 chronic pain in children and adolescents ranged from 11-38% depending on pain type and varied  
27 substantially across studies. The prevalence of chronic pain was found to be higher in girls and  
28 prevalence proportions increased with age.[20] The review identified several psychosocial  
29 correlates of chronic pain in children and adolescents such as lower socio-economic status,  
30 anxiety, depression and low self-esteem.[20] However, other correlates of chronic pain in  
31 children and adolescents, such as sleep[21,22] and post-traumatic stress disorder,[23,24] have  
32 since been identified and were not consistently examined at the population level at the time of  
33 the past review. The review also identified several gaps in the understanding of the epidemiology  
34 of chronic pain in children and adolescents, including restricted age ranges and lack of  
35 longitudinal studies.[20] Furthermore, at the time of the past review the quality of included  
36 studies was generally low to moderate and methodological limitations, such as inconsistent  
37  
38  
39  
40  
41  
42  
43  
44  
45  
46  
47  
48  
49  
50  
51  
52  
53  
54  
55  
56  
57  
58  
59  
60

1  
2  
3 definitions of pain between studies, made it difficult to estimate overall prevalence  
4  
5 proportions.[20]  
6

7  
8 The literature on pediatric pain is growing exponentially; a recent bibliometric analysis  
9  
10 revealed that there was nearly a 40-fold increase in the number of publications on pediatric pain  
11  
12 from 1975 to 2010.[25] Since the last comprehensive systematic review on the epidemiology of  
13  
14 chronic pain in children and adolescents,[20] numerous population-based studies estimating the  
15  
16 prevalence of various forms of pediatric chronic pain have been published.[26–28] A few recent  
17  
18 reviews estimating the prevalence of certain forms of chronic pain, such as functional abdominal  
19  
20 pain[29] and headache[30,31] have also been conducted. However, in order to appropriately  
21  
22 meet the clinical needs of children and adolescents with chronic pain, an updated review that  
23  
24 estimates the proportion of various forms of chronic pain and examines key sociodemographic  
25  
26 and psychosocial correlates of chronic pain in children and adolescents is needed.  
27  
28  
29

30  
31 This manuscript outlines a protocol for a systematic review to update a prior review  
32  
33 synthesizing the published literature on the prevalence of chronic pain in children and  
34  
35 adolescents. Specifically, the objectives of this review are to: 1) Provide updated estimates of the  
36  
37 prevalence of various forms of chronic pain (headache, abdominal pain, back pain,  
38  
39 musculoskeletal pain, combined pain, general pain, and other pain) in children and adolescents;  
40  
41 2) Provide an updated examination of sociodemographic (e.g., age, sex, race) and psychosocial  
42  
43 (e.g., anxiety, depression, sleep) factors related to the prevalence of chronic pain in children and  
44  
45 adolescents; and 3) Assess study quality and identify gaps in the literature and areas for future  
46  
47 research.  
48  
49  
50

## 51 **METHODS AND ANALYSIS**

52  
53  
54  
55  
56  
57  
58  
59  
60



1  
2  
3 This systematic review protocol was prepared in accordance with the Preferred Reporting  
4 Items for Systematic Reviews and Meta-Analyses Protocols (PRISMA-P) guidelines (see  
5 supplementary file 1).[32] The study protocol was registered with the International Prospective  
6 Register of Systematic Reviews (PROSPERO) on September 3, 2020. In the event of an  
7 amendment to this protocol, the date of the amendment, a description of the change and the  
8 rationale will be documented and recorded in PROSPERO. The dates for this review are May 14,  
9 2020-April 1, 2021(expected).

### 19 **Search strategy**

21 We will search the following electronic databases: EMBASE, PubMed, CINAHL and  
22 PsycINFO. The search terms will be comprised of three conceptual blocks: i) Pain terms (e.g.,  
23 musculoskeletal pain, back pain, headache, abdominal pain, recurrent pain); ii) Pediatric terms  
24 (e.g., child, adolescent, boy, girl); and iii) Epidemiological terms (e.g., epidemiology,  
25 prevalence, frequency). The searches will be restricted to English language articles, human  
26 studies, and manuscripts published between January 2009-June 2020 (the original systematic  
27 review[20] included studies published up until 2009).

### 37 **Eligibility criteria**

39 Studies will be eligible for inclusion if they meet the following criteria:

- 41 1. Observational studies using a population-based sampling frame to estimate the  
42 prevalence of chronic pain in children or adolescents (study sample age  $\leq 19$  years).
- 43 2. Studies examining the prevalence of chronic pain in children and adolescents, defined as  
44 pain with a minimum duration of at least 3 months or pain that is described as chronic,  
45 persistent, or recurrent. This definition was selected to align with current  
46 conceptualizations of chronic pain [1] while allowing for flexibility to accommodate  
47  
48  
49  
50  
51  
52  
53  
54  
55  
56  
57  
58  
59  
60

1  
2  
3 established diagnostic criteria for common childhood chronic pain conditions (e.g.,  
4 functional abdominal pain [33] and migraine [34]).  
5  
6

- 7  
8 3. Studies published in peer-reviewed journals in English.  
9

10 Studies meeting the following criteria will be excluded:

- 11  
12 1. Studies with sampling frames not deemed to be population-based.  
13  
14 2. Case studies, conference abstracts, dissertations, reviews, book chapters and qualitative  
15 studies.  
16  
17 3. Studies reporting on the prevalence of chronic pain in adults (sample age is exclusively  
18  $\geq 20$  years)  
19  
20 4. Studies of non-human samples.  
21  
22 5. Studies examining the prevalence of chronic pain in specific sub-populations, such as  
23 children and adolescents with chronic illnesses (e.g., cancer, arthritis) or other health  
24 conditions (e.g., cerebral palsy, muscular dystrophy).  
25  
26  
27  
28  
29  
30  
31  
32

33 Studies reporting on multiple populations (e.g., adults and children), where data on one or  
34 more sub-populations that fit the eligibility criteria for this review can be separately identified,  
35 will be included and the relevant data will be extracted.  
36  
37  
38  
39

#### 40 **Screening and Data Extraction**

41  
42 Literature search results will be transferred to Covidence systematic review management  
43 software and duplicates will be removed. An initial title/abstract review of studies retrieved by  
44 the search will be independently conducted by two members of the study team to determine  
45 which studies potentially met the inclusion/exclusion criteria. Articles included from the  
46 title/abstract review phase will then be reviewed in full by two reviewers. The two reviewers will  
47  
48  
49  
50  
51  
52  
53  
54  
55  
56  
57  
58  
59  
60

1  
2  
3 be blinded to each other's decisions. Discrepancies regarding the eligibility of a study will be  
4  
5 resolved by consensus, and if necessary, through discussion with a third reviewer.  
6

7  
8 Data will be extracted from included studies using customized forms. Extracted  
9  
10 information will include study design, location where the study was conducted, number of  
11  
12 participants, participant demographics (e.g., age, sex, race), study sample (e.g., headache only,  
13  
14 abdominal pain only, back pain only, musculoskeletal pain, combined pain, general pain, and  
15  
16 other pain), study methodology, prevalence proportion of chronic pain, and sociodemographic  
17  
18 (e.g., age, sex, race, parent education, household income) and psychosocial (e.g., anxiety,  
19  
20 depression, sleep, post-traumatic stress) predictors of chronic pain. In accordance with the  
21  
22 PRISMA guidelines [35], the number of studies meeting inclusion criteria will be recorded and  
23  
24 the reason for exclusion of those not included will be documented.  
25  
26  
27

### 28 **Quality Assessment**

29  
30 Two independent reviewers will assess study quality using the 10-item tool developed by  
31  
32 Hoy et al. (2012). This tool was developed to assess external and internal validity of prevalence  
33  
34 studies.[36] Response options for each item are either "yes" (indicating low risk of bias) or "no"  
35  
36 (indicating high risk of bias).[36] The tool will be adapted for this review if necessary.  
37  
38 Consensus will be reached by discussion between the reviewers.  
39  
40  
41

### 42 **Data Synthesis**

43  
44 A narrative synthesis will summarize the prevalence proportions of chronic pain in  
45  
46 children and adolescents in the following categories; headache only; abdominal pain only; back  
47  
48 pain only; musculoskeletal pain; combined pain; general pain; and other pain. Additionally, the  
49  
50 relationship between psychosocial factors (e.g., sleep, anxiety, and depression) and  
51  
52 sociodemographic factors (e.g., sex, age, race and indicators of socio-economic status such as,  
53  
54  
55  
56  
57  
58  
59

1  
2  
3 but not limited to, household income, parental level of education and urban versus rural area of  
4 residence) and chronic pain in children and adolescents will be reviewed.  
5  
6

7  
8 Depending on the heterogeneity of included studies the prevalence proportions of chronic  
9 pain will be calculated using median prevalence proportions and/or meta-analysis. When at least  
10 two or more studies are comparable in terms of the study sample (e.g., category of chronic pain),  
11 and methodology (e.g., operationalization of chronic pain), we will pool the effects to determine  
12 the prevalence proportion of chronic pain across studies. Similarly, if studies have used similar  
13 methods to examine the relationship between certain sociodemographic and/or psychosocial  
14 variables in comparable chronic pain samples, we will conduct separate meta-regressions to  
15 examine the relationship between these variables and chronic pain across studies.  
16  
17  
18  
19  
20  
21  
22  
23  
24  
25

26 Reporting of this systematic review will follow PRISMA guidelines.[37] A PRISMA  
27 flow diagram will be included in the final manuscript of this review.  
28  
29

### 30 **Ethics and Dissemination**

31  
32  
33 Ethical approval will not be sought for this study, as no human subject participants will  
34 be involved. A manuscript outlining the results of this review will be submitted for publication in  
35 a peer-reviewed academic journal and for presentation at relevant academic conferences. Results  
36 will be publicly disseminated through social media, news and media outlets, and newsletters and  
37 blog posts, as appropriate.  
38  
39  
40  
41  
42  
43

### 44 **IMPLICATIONS OF THE REVIEW**

45  
46  
47 We anticipate that the results from this review will enhance our understanding of the  
48 current burden of pediatric chronic pain which may help inform treatment and allocation of  
49 clinical resources for this population. Furthermore, findings from this study will identify priority  
50 areas for research on the epidemiology of chronic pain to guide future research efforts. Through  
51  
52  
53  
54  
55  
56  
57  
58  
59  
60

our planned knowledge translation efforts, findings of the review will be disseminated not only to clinicians and scientists, but also to patients and families, which may aid in public awareness and advocacy efforts.

### **PATIENT AND PUBLIC INVOLVEMENT**

This protocol was designed in collaboration with a patient partner and co-author, JM. JM will remain involved as a patient partner throughout all steps of the review.

### **CONTRIBUTORS**

CTC conceived the study idea. CL, PRT, and JAP designed the study protocol, data extraction, and statistical analysis and wrote the first draft of the manuscript. CTC, DC, GAF, GTJ, GJM and JM provided critical insights at all stages. All authors approved and contributed to the final manuscript.

### **FUNDING**

This work was supported by an operating grant from the Canadian Institutes of Health Research (FRN167902) awarded to CTC and funding from the Dalhousie Medical Research Foundation (DMRF). CTC is the senior author and is supported by a Tier 1 Canada Research Chair with infrastructure support from the Canada Foundation for Innovation. CL is supported by an IWK Health Centre Summer Studentship [1025420]. PRT is supported by a Research Nova Scotia Scholars Award, a Nova Scotia Graduate Scholarship, and an IWK Graduate Studentship Award and is a trainee member of Pain Child Health (PICH).

### **COMPETING INTERESTS**

None declared.

### **PATIENT CONSENT FOR PUBLICATION**

Not required.

**DATA AVAILABILITY STATEMENT**

Data sharing not applicable as no datasets were generated and/or analysed for this protocol.

For peer review only

## REFERENCES

- 1 Treede R-D, Rief W, Barke A, *et al.* A classification of chronic pain for ICD-11. *PAIN* 2015;**156**:1. doi:10.1097/j.pain.000000000000160
- 2 Al-Hashel JY, Ahmed SF, Alroughani R. Prevalence and burden of primary headache disorders in Kuwaiti children and adolescents: A community based study. *Front Neurol* 2019;**10**:793. doi:10.3389/fneur.2019.00793
- 3 Malik AH, Shah PA, Yaseen Y. Prevalence of primary headache disorders in school-going children in Kashmir Valley (North-west India). *Ann Indian Acad Neurol* 2012;**15**:100–3. doi:10.4103/0972-2327.100030
- 4 Zheng S, Fu W, Zhou J, *et al.* Prevalence and related factors of irritable bowel syndrome among middle-school students in areas affected by Wenchuan earthquake: An epidemiological study. *J. Clin. Gastroenterol.* 2012;**46**:345–6. doi:10.1097/MCG.0b013e31824712d0
- 5 Demirceken FG, Kurt G, Dulkadir R, *et al.* Functional dyspepsia in children: A Turkish prospective survey in Kirikkale province. 2010.
- 6 Shelby GD, Shirkey KC, Sherman AL, *et al.* Functional abdominal pain in childhood and long-term vulnerability to anxiety disorders. *Pediatrics* 2013;**132**:475–82. doi:10.1542/peds.2012-2191
- 7 Simons LE, Sieberg CB, Claar RL. Anxiety and impairment in a large sample of children and adolescents with chronic pain. *Pain Res Manag* 2012;**17**:93–7. doi:10.1155/2012/420676
- 8 Logan DE, Gray LS, Iversen CN, *et al.* School Self-Concept in Adolescents With Chronic Pain. *J Pediatr Psychol* 2017;**42**:892–901. doi:10.1093/jpepsy/jsx063

- 1  
2  
3 9 Maes M, Van den Noortgate W, Fustolo-Gunnink SF, *et al.* Loneliness in Children and  
4 Adolescents With Chronic Physical Conditions: A Meta-Analysis. *J Pediatr Psychol*  
5 2017;**42**:622–35. doi:10.1093/jpepsy/jsx046  
6  
7  
8  
9  
10 10 Gold JI, Yetwin AK, Mahrer NE, *et al.* Pediatric Chronic Pain and Health-Related Quality of  
11 Life. *J Pediatr Nurs* 2009;**24**:141–50. doi:10.1016/j.pedn.2008.07.003  
12  
13  
14  
15 11 Huguet A, Miró J. The Severity of Chronic Pediatric Pain: An Epidemiological Study. *J Pain*  
16 2008;**9**:226–36. doi:10.1016/j.jpain.2007.10.015  
17  
18  
19  
20 12 Walker LS, Dengler-Crish CM, Rippel S, *et al.* Functional abdominal pain in childhood and  
21 adolescence increases risk for chronic pain in adulthood. *PAIN* 2010;**150**:568–572.  
22  
23  
24  
25  
26  
27 13 Larsson B, Sigurdson JF, Sund AM. Long-term follow-up of a community sample of  
28 adolescents with frequent headaches. *J Headache Pain* 2018;**19**:79. doi:10.1186/s10194-  
29  
30  
31  
32  
33  
34 14 Hassett AL, Hilliard PE, Goesling J, *et al.* Reports of chronic pain in childhood and  
35 adolescence among patients at a tertiary care pain clinic. *J Pain* 2013;**14**:1390–7.  
36  
37  
38  
39  
40 15 Groenewald CB, Law EF, Fisher E, *et al.* Associations Between Adolescent Chronic Pain  
41 and Prescription Opioid Misuse in Adulthood. *J Pain* 2019;**20**:28–37.  
42  
43  
44  
45  
46  
47 16 Noel M, Groenewald CB, Beals-Erickson SE, *et al.* Chronic Pain in Adolescence and  
48 Internalizing Mental Health Disorders: A Nationally Representative Study. *Pain*  
49 2016;**157**:1333–8. doi:10.1097/j.pain.0000000000000522  
50  
51  
52  
53  
54  
55  
56  
57  
58  
59  
60



- 1  
2  
3 17 Ho IK, Goldschneider KR, Kashikar-Zuck S, *et al.* Healthcare Utilization and Indirect  
4 Burden among Families of Pediatric Patients with Chronic Pain. *J Musculoskelet Pain*  
5 2008;**16**:155–64. doi:10.1080/10582450802161853  
6  
7  
8  
9  
10 18 Groenewald CB, Essner BS, Wright D, *et al.* The economic costs of chronic pain among a  
11 cohort of treatment-seeking adolescents in the United States. *J Pain* 2014;**15**:925–33.  
12 doi:10.1016/j.jpain.2014.06.002  
13  
14  
15  
16  
17 19 Tumin D, Drees D, Miller R, *et al.* Health Care Utilization and Costs Associated With  
18 Pediatric Chronic Pain. *J Pain* 2018;**19**:973–82. doi:10.1016/j.jpain.2018.03.012  
19  
20  
21 20 King S, Chambers CT, Huguet A, *et al.* The epidemiology of chronic pain in children and  
22 adolescents revisited: A systematic review. *Pain* 2011;**152**:2729–38.  
23 doi:10.1016/j.pain.2011.07.016  
24  
25  
26  
27  
28 21 Evans S, Djilas V, Seidman LC, *et al.* Sleep Quality, Affect, Pain, and Disability in Children  
29 With Chronic Pain: Is Affect a Mediator or Moderator? *J Pain* 2017;**18**:1087–95.  
30 doi:10.1016/j.jpain.2017.04.007  
31  
32  
33  
34  
35 22 Murphy LK, Palermo TM, Tham SW, *et al.* Comorbid Sleep Disturbance in Adolescents  
36 with Functional Abdominal Pain. *Behav Sleep Med* 2020;**0**:1–10.  
37 doi:10.1080/15402002.2020.1781634  
38  
39  
40  
41  
42 23 Noel M, Wilson AC, Holley AL, *et al.* Posttraumatic stress disorder symptoms in youth with  
43 vs without chronic pain. *Pain* 2016;**157**:2277–84. doi:10.1097/j.pain.0000000000000642  
44  
45  
46  
47 24 Stahlschmidt L, Rosenkranz F, Dobe M, *et al.* Posttraumatic stress disorder in children and  
48 adolescents with chronic pain. *Health Psychol* 2020;**39**:463–70. doi:10.1037/hea0000859  
49  
50  
51  
52  
53  
54  
55  
56  
57  
58  
59  
60

- 1  
2  
3 25 Caes L, Boerner KE, Chambers CT, *et al.* A comprehensive categorical and bibliometric  
4 analysis of published research articles on pediatric pain from 1975 to 2010. *Pain*.  
5  
6 2016;**157**:302–13. doi:10.1097/j.pain.0000000000000403  
7  
8  
9  
10 26 Oswari H, Alatas FS, Hegar B, *et al.* Functional abdominal pain disorders in adolescents in  
11  
12 Indonesia and their association with family related stress. *BMC Pediatr* 2019;**19**:342–5.  
13  
14 doi:10.1186/s12887-019-1682-5 [doi]  
15  
16  
17 27 Aartun E, Hartvigsen J, Wedderkopp N, *et al.* Spinal pain in adolescents: prevalence,  
18  
19 incidence, and course: a school-based two-year prospective cohort study in 1,300 Danes aged  
20  
21 11–13. *BMC Musculoskelet Disord* 2014;**15**:187. doi:10.1186/1471-2474-15-187  
22  
23  
24 28 Arruda MA, Arruda R, Guidetti V, *et al.* Psychosocial adjustment of children with migraine  
25  
26 and tension-type headache - a nationwide study. *Headache* 2015;**55 Suppl 1**:39–50.  
27  
28 doi:10.1111/head.12510  
29  
30  
31 29 Korterink JJ, Diederik K, Benninga MA, *et al.* Epidemiology of Pediatric Functional  
32  
33 Abdominal Pain Disorders: A Meta-Analysis. *PLOS ONE* 2015;**10**:e0126982–e0126982.  
34  
35 doi:10.1371/journal.pone.0126982  
36  
37  
38 30 Albers L, von Kries R, Heinen F, *et al.* Headache in School Children: Is the Prevalence  
39  
40 Increasing? *Curr Pain Headache Rep* 2015;**19**:4. doi:10.1007/s11916-015-0477-0  
41  
42  
43 31 Wöber-Bingöl Ç. Epidemiology of migraine and headache in children and adolescents  
44  
45 topical collection on childhood and adolescent headache. *Curr Pain Headache Rep*  
46  
47 2013;**17**:1–11. doi:10.1007/s11916-013-0341-z  
48  
49  
50 32 Moher D, Shamseer L, Clarke M, *et al.* Preferred reporting items for systematic review and  
51  
52 meta-analysis protocols (PRISMA-P) 2015 statement. *Rev Espanola Nutr Humana Diet*  
53  
54 2016;**20**:148–60. doi:10.1186/2046-4053-4-1  
55  
56  
57  
58  
59  
60

- 1  
2  
3 33 Hyams JS, Di Lorenzo C, Saps M, *et al.* Childhood Functional Gastrointestinal Disorders:  
4 Child/Adolescent. *Gastroenterology* 2016;**150**:1456-1468.e2.  
5  
6  
7 doi:10.1053/j.gastro.2016.02.015  
8  
9
- 10 34 Headache Classification Committee of the International Headache Society (IHS). The  
11 International Classification of Headache Disorders, 3rd edition. *Cephalalgia* 2018;**38**:1–211.  
12  
13  
14 doi:10.1177/0333102417738202  
15  
16
- 17 35 Moher D, Liberati A, Tetzlaff J, *et al.* Preferred reporting items for systematic reviews and  
18 meta-analyses: The PRISMA statement. *PLoS Med.* 2009;**6**.  
19  
20  
21 doi:10.1371/journal.pmed.1000097  
22  
23
- 24 36 Hoy D, Brooks P, Woolf A, *et al.* Assessing risk of bias in prevalence studies: Modification  
25 of an existing tool and evidence of interrater agreement. *J Clin Epidemiol* 2012;**65**:934–9.  
26  
27  
28 doi:10.1016/j.jclinepi.2011.11.014  
29  
30
- 31 37 Moher D, Liberati A, Tetzlaff J, *et al.* Preferred reporting items for systematic reviews and  
32 meta-analyses: The PRISMA statement. *PLoS Med.* 2009;**6**.  
33  
34  
35 doi:10.1371/journal.pmed.1000097  
36  
37  
38  
39  
40  
41  
42  
43  
44  
45  
46  
47  
48  
49  
50  
51  
52  
53  
54  
55  
56  
57  
58  
59  
60

Additional file 1: PRISMA-P (Preferred Reporting Items for Systematic review and Meta-Analysis Protocols) 2015 checklist: recommended items to address in a systematic review protocol

### PRISMA Protocol Checklist

| Section and topic                 | Item No | Checklist                                                                                                                                                                                       | Reporting Page No |
|-----------------------------------|---------|-------------------------------------------------------------------------------------------------------------------------------------------------------------------------------------------------|-------------------|
| <b>ADMINISTRATIVE INFORMATION</b> |         |                                                                                                                                                                                                 |                   |
| Title:                            |         |                                                                                                                                                                                                 |                   |
| Identification                    | 1a      | Identify the report as a protocol of a systematic review                                                                                                                                        | 1                 |
| Update                            | 1b      | If the protocol is for an update of a previous systematic review, identify as such                                                                                                              | 1,3               |
| Registration                      | 2       | If registered, provide the name of the registry (e.g., PROSPERO) and registration number                                                                                                        | 3                 |
| Authors:                          |         |                                                                                                                                                                                                 |                   |
| Contact                           | 3a      | Provide name, institutional affiliation, and e-mail address of all protocol authors; provide physical mailing address of corresponding author                                                   | 1                 |
| Contributions                     | 3b      | Describe contributions of protocol authors and identify the guarantor of the review                                                                                                             | 12                |
| Amendments                        | 4       | If the protocol represents an amendment of a previously completed or published protocol, identify as such and list changes; otherwise, state plan for documenting important protocol amendments | 8                 |
| Support:                          |         |                                                                                                                                                                                                 |                   |
| Sources                           | 5a      | Indicate sources of financial or other support for the review                                                                                                                                   | 12                |
| Sponsor                           | 5b      | Provide name for the review funder and/or sponsor Role of sponsor/ funder                                                                                                                       | N/A               |
| Role of sponsor or funder         | 5c      | Describe roles of funder(s), sponsor(s), and/or institution(s), if any, in developing the protocol                                                                                              | N/A               |
| <b>INTRODUCTION</b>               |         |                                                                                                                                                                                                 |                   |
| Rationale                         | 6       | Describe the rationale for the review in the context of what is already known                                                                                                                   | 5-7               |
| Objectives                        | 7       | Provide an explicit statement of the question(s) the review will address with reference to participants, interventions, comparators, and outcomes (PICO)                                        | 7                 |
| <b>METHODS</b>                    |         |                                                                                                                                                                                                 |                   |
| Eligibility criteria              | 8       | Specify the study characteristics (e.g., PICO, study design, setting, time frame) and report characteristics (e.g., years                                                                       | 8-9               |

|                                    |     |                                                                                                                                                                                                                                                      |                                    |
|------------------------------------|-----|------------------------------------------------------------------------------------------------------------------------------------------------------------------------------------------------------------------------------------------------------|------------------------------------|
|                                    |     | considered, language, publication status) to be used as criteria for eligibility for the review                                                                                                                                                      |                                    |
| Information sources                | 9   | Describe all intended information sources (e.g., electronic databases, contact with study authors, trial registers, or other grey literature sources) with planned dates of coverage                                                                 | 8                                  |
| Search Strategy                    | 10  | Present draft of search strategy to be used for at least one electronic database, including planned limits, such that it could be repeated                                                                                                           | To be included in final manuscript |
| Study Records                      |     |                                                                                                                                                                                                                                                      |                                    |
|                                    | 11a | Describe the mechanism(s) that will be used to manage records and data throughout the review                                                                                                                                                         | 9                                  |
|                                    | 11b | State the process that will be used for selecting studies (e.g., two independent reviewers) through each phase of the review (i.e., screening, eligibility, and inclusion in meta-analysis)                                                          | 9-11                               |
|                                    | 11c | Describe planned method of extracting data from reports (e.g., piloting forms, done independently, in duplicate), any processes for obtaining and confirming data from investigators                                                                 | 9-11                               |
| Data items                         | 12  | List and define all variables for which data will be sought (e.g., PICO items, funding sources), any pre-planned data assumptions and simplifications                                                                                                | 9,10                               |
| Outcomes and prioritization        | 13  | List and define all outcomes for which data will be sought, including prioritization of main and additional outcomes, with rationale                                                                                                                 | 9-11                               |
| Risk of bias in individual studies | 14  | Describe anticipated methods for assessing risk of bias of individual studies, including whether this will be done at the outcome or study level, or both; state how this information will be used in data synthesis                                 | 10                                 |
| Data synthesis                     |     |                                                                                                                                                                                                                                                      |                                    |
|                                    | 15a | Describe criteria under which study data will be quantitatively synthesized                                                                                                                                                                          | 10,11                              |
|                                    | 15b | If data are appropriate for quantitative synthesis, describe planned summary measures, methods of handling data, and methods of combining data from studies, including any planned exploration of consistency (e.g., I <sup>2</sup> , Kendall's tau) | 10,11                              |
|                                    | 15c | Describe any proposed additional analyses (e.g., sensitivity or subgroup analyses, meta-regression)                                                                                                                                                  | 10,11                              |
|                                    | 15d | If quantitative synthesis is not appropriate, describe the type of summary planned                                                                                                                                                                   | 10,11                              |

|                                   |    |                                                                                                                             |     |
|-----------------------------------|----|-----------------------------------------------------------------------------------------------------------------------------|-----|
| Meta-bias(es)                     | 16 | Specify any planned assessment of meta-bias(es) (e.g., publication bias across studies, selective reporting within studies) | N/A |
| Confidence in cumulative evidence | 17 | Describe how the strength of the body of evidence will be assessed (e.g., GRADE)                                            | N/A |

From: Shamseer L, Moher D, Clarke M, Ghersi D, Liberati A, Petticrew M, Shekelle P, Stewart L, PRISMA-P Group. Preferred reporting items for systematic review and meta-analysis protocols (PRISMA-P) 2015: elaboration and explanation. *BMJ*. 2015 Jan 2;349(jan02 1):g7647.
