# Supplementary material for: Epidemiology of chronic pain in children and adolescents: a protocol for a systematic review update
Source: PubMed Central journal article supplement — BMJ Open. 2021 Feb 16;11(2):e043675. doi: 10.1136/bmjopen-2020-043675 (PMC7888311; doi:10.1136/bmjopen-2020-043675), 2021-02-16
Supplement: bmjopen-2020-043675supp001.pdf [file bmjopen-2020-043675supp001.pdf]

Additional file 1: PRISMA-P (Preferred Reporting Items for Systematic review and Meta-Analysis Protocols) 2015 checklist: recommended items to address in a systematic review protocol

PRISMA Protocol Checklist

| Section and topic                 | Item No | Checklist                                                                                                                                                                                       | Reporting. Page No |
|-----------------------------------|---------|-------------------------------------------------------------------------------------------------------------------------------------------------------------------------------------------------|--------------------|
| <b>ADMINISTRATIVE INFORMATION</b> |         |                                                                                                                                                                                                 |                    |
| Title:                            |         |                                                                                                                                                                                                 |                    |
| Identification                    | 1a      | Identify the report as a protocol of a systematic review                                                                                                                                        | 1                  |
| Update                            | 1b      | If the protocol is for an update of a previous systematic review, identify as such                                                                                                              | 1,2                |
| Registration                      | 2       | If registered, provide the name of the registry (e.g., PROSPERO) and registration number                                                                                                        | 1, 2               |
| Authors:                          |         |                                                                                                                                                                                                 |                    |
| Contact                           | 3a      | Provide name, institutional affiliation, and e-mail address of all protocol authors; provide physical mailing address of corresponding author                                                   | 1, 3, 4            |
| Contributions                     | 3b      | Describe contributions of protocol authors and identify the guarantor of the review                                                                                                             | 1, 4               |
| Amendments                        | 4       | If the protocol represents an amendment of a previously completed or published protocol, identify as such and list changes; otherwise, state plan for documenting important protocol amendments | 2                  |
| Support:                          |         |                                                                                                                                                                                                 |                    |
| Sources                           | 5a      | Indicate sources of financial or other support for the review                                                                                                                                   | 4                  |
| Sponsor                           | 5b      | Provide name for the review funder and/or sponsor Role of sponsor/ funder                                                                                                                       | N/A                |
| Role of sponsor or funder         | 5c      | Describe roles of funder(s), sponsor(s), and/or institution(s), if any, in developing the protocol                                                                                              | N/A                |
| <b>INTRODUCTION</b>               |         |                                                                                                                                                                                                 |                    |
| Rationale                         | 6       | Describe the rationale for the review in the context of what is already known                                                                                                                   | 1-2                |
| Objectives                        | 7       | Provide an explicit statement of the question(s) the review will address with reference to participants, interventions, comparators, and outcomes (PICO)                                        | 2                  |
| <b>METHODS</b>                    |         |                                                                                                                                                                                                 |                    |
| Eligibility criteria              | 8       | Specify the study characteristics (e.g., PICO, study design, setting, time frame) and report characteristics (e.g., years                                                                       | 2-3                |

|                                    |     |                                                                                                                                                                                                                                                      |                                                             |
|------------------------------------|-----|------------------------------------------------------------------------------------------------------------------------------------------------------------------------------------------------------------------------------------------------------|-------------------------------------------------------------|
|                                    |     | considered, language, publication status) to be used as criteria for eligibility for the review                                                                                                                                                      |                                                             |
| Information sources                | 9   | Describe all intended information sources (e.g., electronic databases, contact with study authors, trial registers, or other grey literature sources) with planned dates of coverage                                                                 | 2                                                           |
| Search Strategy                    | 10  | Present draft of search strategy to be used for at least one electronic database, including planned limits, such that it could be repeated                                                                                                           | 2 (full search strategy to be included in final manuscript) |
| Study Records                      |     |                                                                                                                                                                                                                                                      |                                                             |
|                                    | 11a | Describe the mechanism(s) that will be used to manage records and data throughout the review                                                                                                                                                         | 3                                                           |
|                                    | 11b | State the process that will be used for selecting studies (e.g., two independent reviewers) through each phase of the review (i.e., screening, eligibility, and inclusion in meta-analysis)                                                          | 3                                                           |
|                                    | 11c | Describe planned method of extracting data from reports (e.g., piloting forms, done independently, in duplicate), any processes for obtaining and confirming data from investigators                                                                 | 3                                                           |
| Data items                         | 12  | List and define all variables for which data will be sought (e.g., PICO items, funding sources), any pre-planned data assumptions and simplifications                                                                                                | 3                                                           |
| Outcomes and prioritization        | 13  | List and define all outcomes for which data will be sought, including prioritization of main and additional outcomes, with rationale                                                                                                                 | 3                                                           |
| Risk of bias in individual studies | 14  | Describe anticipated methods for assessing risk of bias of individual studies, including whether this will be done at the outcome or study level, or both; state how this information will be used in data synthesis                                 | 3                                                           |
| Data synthesis                     |     |                                                                                                                                                                                                                                                      |                                                             |
|                                    | 15a | Describe criteria under which study data will be quantitatively synthesized                                                                                                                                                                          | 3                                                           |
|                                    | 15b | If data are appropriate for quantitative synthesis, describe planned summary measures, methods of handling data, and methods of combining data from studies, including any planned exploration of consistency (e.g., I <sup>2</sup> , Kendall's tau) | 3                                                           |
|                                    | 15c | Describe any proposed additional analyses (e.g., sensitivity or subgroup analyses, meta-regression)                                                                                                                                                  | 3                                                           |
|                                    | 15d | If quantitative synthesis is not appropriate, describe the type                                                                                                                                                                                      | 3                                                           |

|                                   |    |                                                                                                                             |     |
|-----------------------------------|----|-----------------------------------------------------------------------------------------------------------------------------|-----|
|                                   |    | of summary planned                                                                                                          |     |
| Meta-bias(es)                     | 16 | Specify any planned assessment of meta-bias(es) (e.g., publication bias across studies, selective reporting within studies) | N/A |
| Confidence in cumulative evidence | 17 | Describe how the strength of the body of evidence will be assessed (e.g., GRADE)                                            | N/A |

From: Shamseer L, Moher D, Clarke M, Gherzi D, Liberati A, Petticrew M, Shekelle P, Stewart L, PRISMA-P Group. Preferred reporting items for systematic review and meta-analysis protocols (PRISMA-P) 2015: elaboration and explanation. *BMJ*. 2015 Jan 2;349(jan02 1):g7647.
